# Supplementary material
Source: ML conference proceedings conference paper supplement (https://openreview.net/forum?id=t84UBRhhvp)
Supplement: supplementary_material [file attachment]

# TEXT DESCRIPTIONS ARE COMPRESSIVE AND INVARIANT REPRESENTATIONS FOR VISUAL LEARNING

**Anonymous authors**

Paper under double-blind review

## ABSTRACT

Modern image classification is based upon directly predicting classes via large discriminative networks, which do not directly contain information about the intuitive visual features that may constitute a classification decision. Recently, work in vision-language models (VLM) such as CLIP has provided ways to specify natural language descriptions of image classes, but typically focuses on providing single descriptions for each class. In this work, we demonstrate that an alternative approach, in line with humans’ understanding of multiple visual features per class, can also provide compelling performance in the robust few-shot learning setting. In particular, we introduce a novel method, *SLR-AVD (Sparse Logistic Regression using Augmented Visual Descriptors)*. This method first automatically generates multiple visual descriptions of each class via a large language model (LLM), then uses a VLM to translate these descriptions to a set of visual feature embeddings of each image, and finally uses sparse logistic regression to select a relevant subset of these features to classify each image. Core to our approach is the fact that, information-theoretically, these descriptive features are more invariant to domain shift than traditional image embeddings, even though the VLM training process is not explicitly designed for invariant representation learning. These invariant descriptive features also compose a better input compression scheme. When combined with finetuning, we show that SLR-AVD is able to outperform existing state-of-the-art finetuning approaches on both in-distribution and out-of-distribution performance.

## 1 INTRODUCTION

Self-supervised vision-language models (VLMs) like CLIP (Radford et al., 2021) create aligned image and text encoders via contrastive training. Unlike traditionally-trained classification networks, such alignment enables zero-shot image classification by prompting the text encoder with hand-crafted inputs like “a photo of {}” then predicting the target via the maximal inner product with the input image embedding. However, choosing effective prompts for zero-shot learning remains largely an ad-hoc process: Radford et al. (2021) has added several prompts like “the cartoon {}” or “art of the {}” aiming to improve ImageNet-R (Hendrycks et al., 2021a) performance, which (somewhat surprisingly) improved standard ImageNet accuracy as well. This has led to works that attempt to automatically extract relevant prompts from language models (Pratt et al., 2022), including work that uses these models to extract *multiple* visual descriptors (Menon & Vondrick, 2022) then use the average prediction of these visual descriptions to classify the image.

In the few-shot setting, however, where a small amount of training data is available, a number of techniques can further improve classifier performance beyond zero-shot prompting alone. For example, it has become commonplace to finetune zero-shot classifiers via linear probing or other approaches (Kumar et al., 2022), including methods that interpolate between the zero-shot and finetuned classifiers (Wortsman et al., 2022) to achieve better out-of-distribution robustness. Alternatively, one can also adapt the prompts themselves using this few-shot data, using e.g. techniques from soft prompt tuning (Zhou et al., 2022b), though these learned prompts are not readable, nor are their nearest dictionary projections (Khashabi et al., 2021). Finally, recent work has also looked at ways to combine automatically-extracted prompts using few-shot learning (Yang et al., 2022), though this approach used a very specific learned weighting over such descriptions for interpretability purposes.

In this work, we investigate the visual learning problem with text descriptive features from an information-theoretic perspective. In particular, our motivation comes from two desiderata: compression and invariance (to domain shifts). The information bottleneck perspective encourages representations to compress the input as much as possible while maintaining high mutual information with the labels. On the other hand, the invariance principle favors representations that are less informative about the domains, in particular, the mutual information between the representations and the domain index should be small (Zhao et al., 2022; Li et al., 2021; 2022; Zhao et al., 2019; Arjovsky et al., 2019; Ahuja et al., 2021). Rooted in these information-theoretic principles, we propose a simple and effective method to generate classifiers based upon multiple automatically-extracted visual descriptors of each class. Our new method, SLR-AVD (Sparse Logistic Regression using Augmented Visual Descriptors), uses a language model to extract multiple potential visual features of each class, then uses  $\ell_1$ -regularized logistic regression to fit a sparse linear classifier on top of these visual descriptions. The key observation that supports our method is that these descriptive features retain substantial information about the true labels, yet are not informative about the domain index, making them good invariant representations of the images. Additionally, these descriptive features are better input compressors and thus can generalize better.

Once the important visual descriptors are selected, we can also finetune the image encoder with the selected sparse pattern to further improve classification accuracies. Using this procedure, SLR-AVD outperforms baselines on both in-distribution (ID) and out-of-distribution (OOD) image classification across a range of image datasets. Specifically, SLR-AVD on ImageNet and its variations (including ImageNet-R, ImageNet V2, etc.) outperform linear probing with image features by 6.2% to 10.48% varying  $k$ -shot from  $k = 1$  to  $k = 32$ . When combining SLR-AVD with WISE-FT (Wortsman et al., 2022), on the in-distribution task, our method outperforms standard finetuning by 1.43% with 1-shot, 1.62% with 2-shot, and 1.61% with 4-shot training data. When we average over five ImageNet variations, we outperform standard finetuning by 0.88% with 1-shot, 0.73% with 2-shot, and 0.64% with 4-shot training data.

**Notation** Throughout the paper, we use  $g(\cdot)$  to denote the text encoder and  $f(\cdot)$  to denote the image encoder. We use  $\mathbf{t}$  for text tokens and  $\mathbf{p}$  for images. For a vector  $\mathbf{v}$ , subscripted  $v_i$  represents the  $i$ th entry. We sometimes overload the notation  $\mathbf{t}_c$  to represent a vector belonging to a class  $c$ , this should be clear from the context. We use  $\mathcal{C}$  to denote the set of classes. We use  $I(X; Y)$  to denote the mutual information between a pair of random variables  $(X, Y)$ .

## 2 RELATED WORKS AND MOTIVATION

### 2.1 PROMPT TUNING IN VLMS

Contrastive VLMS aim to minimize the contrastive loss between matching image-text pairs. Let the image embedding be  $f(\mathbf{p}) \in \mathbb{R}^{(1+M) \times d}$ , the text embedding be  $g(\mathbf{t}) \in \mathbb{R}^{(1+P) \times d}$ . WLOG, let the first entry of the embeddings be the [CLS] token, denote as  $g(\mathbf{t})_0$ . The probability of the prediction is then represented as:  $p(y = c | \mathbf{p}, \mathbf{t}) = \frac{\exp(\langle f(\mathbf{p})_0, g(\mathbf{t}_c)_0 \rangle / \tau)}{\sum_{c'} \exp(\langle f(\mathbf{p})_0, g(\mathbf{t}_{c'})_0 \rangle / \tau)}$ , where  $\mathbf{t}_c$  is the zero-shot text prompt for class  $c$ . The class whose prompt has the largest inner product with the image embedding will be the zero-shot prediction. Zhou et al. (2022b) optimizes over the continuous text embedding space for the best prompts. Several follow-up works (Zhou et al., 2022a; Zhu et al., 2022) propose various prompt tuning methods for different task settings. The methods that eventually use  $g(\mathbf{t}_c)_0$  are in essence regularized linear probing where the search space is constrained by the co-domain of  $g(\cdot)_0$ . Chen et al. (2022) uses local information of the image embedding  $f_1, \dots, f_{M+1}$  for optimizing an optimal transport distance between local image information and prompts. Lu et al. (2022) learns distributions over prompts for efficient adaptation to downstream recognition tasks. Wen et al. (2023) discusses discrete prompt search in the context of text-to-image settings.

Pratt et al. (2022) prompts LLMs for descriptions of each class and shows that these prompts can achieve better zero-shot image classification accuracy. Menon & Vondrick (2022) prompts LLMs to generate visual descriptors for image classification. For each class  $c$ , they query GPT-3 using the prompt “What are useful features for distinguishing a  $\{c\}$  in a photo?”. A score is estimated for  $c$  given an image  $\mathbf{p}$ :  $s(c, \mathbf{p}) = \frac{1}{|D(c)|} \sum_{\mathbf{t} \in D(c)} \phi(\mathbf{t}, \mathbf{p})$ , where

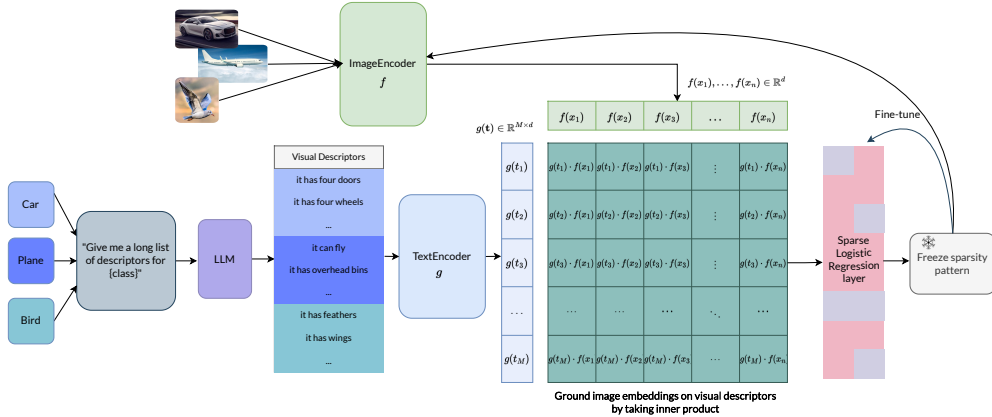

Figure 1: An overview of our proposed method. We prompt GPT-3 for a list of visual descriptors for each class and encode these texts. The image embeddings are instantiated to these descriptors by taking inner products. For an image embedding in  $\mathbb{R}^d$ , this operation projects it onto a  $\mathbb{R}^M$  dimensional space, but it may live in a submanifold. We apply sparse logistic regression over all  $\mathbb{R}^{n \times M}$  training data for feature selection. Finally, we **freeze** the sparsity pattern and finetune both the linear layer and the image encoder to align the image features with the visual descriptors.

$D(c)$  is the set of descriptors for  $c$ , and  $\phi(\mathbf{t}, \mathbf{p}) = \langle f(\mathbf{p})_0, g(\mathbf{t})_0 \rangle$  is the inner product between the image and text embeddings. They show this average ensemble can outperform zero-shot classifiers while maintaining interpretability.

Similar to what we propose, LaBo (Yang et al., 2022) also considers per-class level descriptions in the few-shot setting. A key difference is that they perform a per-class level description filtering through submodular optimization, and they apply softmax to a linear weight  $\sigma(\mathbf{W})$  to ensemble the selected features. On the other hand, we directly select features using sparse logistic regression. Our approach immediately gives both the important features and the coefficients and is statistically optimal under certain sparsity assumptions. One of the potential drawbacks of LaBo is their visual descriptions are filtered per-class level, which can hinder feature sharing between classes. LaBo uses  $\sigma(\mathbf{W})$  in order to gain probabilistic interpretations of the features, while our emphasis on robustness only requires  $\mathbf{W}$  to be sparse.

## 2.2 ROBUST FINE-TUNING OF ZERO-SHOT MODELS

There are numerous works that study robust finetuning of zero-shot models (Goyal et al., 2022; Kumar et al., 2022; Wortsman et al., 2022). In this work, we adopt the weight interpolation method WISE-FT to improve the OOD test accuracy (Wortsman et al., 2022). In general, let  $\Phi$  refer to any set of weights in the network (just the linear layer, linear layer + image encoder, etc). Let the finetuned weight be  $\Phi_{\text{learned}}$  and let the zero-shot predictor be  $\Phi_{\text{zs}}$ . Wortsman et al. (2022) observes that while  $\Phi_{\text{learned}}$  performs better than  $\Phi_{\text{zs}}$  on ID tasks, it is worse at OOD tasks. Hence they propose to interpolate the two sets of weights as  $\alpha\Phi_{\text{learned}} + (1 - \alpha)\Phi_{\text{zs}}$ . This surprisingly simple weight ensemble helps both in-distribution and out-of-distribution tasks. This method also naturally applies to linear probing by simply freezing the CLIP encoder throughout, and only training and interpolating the linear head.

## 2.3 COMPRESSION AND INVARIANT REPRESENTATION

The term ‘‘compression’’ has been given various meanings under different contexts. Arora et al. (2018) derived a PAC bound where generalization depends on the compression of the model parameters; Moran & Yehudayoff (2016) developed a sample compression scheme where both the features and labels are compressed; information bottleneck (Tishby & Zaslavsky, 2015) proposed to learn representations  $Z$  that ‘‘compresses’’ the inputs  $X$  by minimizing  $I(X; Z)$  subject to some constraints. Blier & Ollivier (2018); Blum & Langford (2003) discussed label compression in terms

of model description length. In this work, we use the term to represent input compression (as in the information bottleneck), such that the features contain little information about the inputs. From a PAC-learning perspective, a better input compression will lead to a smaller generalization error (Shwartz-Ziv et al., 2018; Galloway et al., 2022), motivating our use of text descriptive features. A complementary idea from information theory is the invariance principle. The idea is that we want to learn representations that are very informative about the labels, but not so about the domain information. Mathematically, the principle encourages  $\max_Z I(Y; Z) - \lambda I(Z; A)$  where  $A$  is the domain information (Zhao et al., 2022). While it is understood that invariance by itself is insufficient for OOD generalization (Ahuja et al., 2021; Rosenfeld et al., 2020), algorithms based on the invariance principle still achieve competitive results on several OOD benchmarks (Koh et al., 2021).

### 3 PROPOSED METHOD

In this section, we present our proposed method, SLR-AVD, summarized in fig. 1. We will discuss how to generate features, select a sparse set of useful descriptions, and finally, how to align the encoder in detail. We will also state how the proposed method aligns with information-theoretic principles.

#### 3.1 GENERATING VISUAL DESCRIPTORS

To generate the visual descriptors for ImageNet and its variations, we first use the following prompt to query GPT-3: “Give me a long list of descriptions for  $\{\}$ ”.

GPT-3 is quite sensitive to format instruction. Using the prompt “Give me a list” always leads to a list format, making it straightforward to select the useful text with regular expressions. Following the method in Menon & Vondrick (2022), we condition these descriptors on the class name, using texts of the form “ $\{c\}$  which has  $\{t_c^i\}$ ” for each class  $c$  and the  $i$ th descriptor. For each class  $c$ , we gather  $M_c$  descriptors from GPT-3.

Furthermore, for each class, there exists a set of hand-crafted prompt templates like “a photo of  $\{\}$ ” or “an art of  $\{\}$ ”. If there are  $T$  total number of such templates, using the class name  $c$ , we can generate  $T$  total prompt embeddings for each class. We take the average of these prompt embeddings *in addition to* the aforementioned visual descriptors, leading to  $M_c + 1$  number of prompts for each class. For simplicity, we will refer to the GPT-3 generated text features as *visual descriptors* (VD), the templates with class names as *class prompts* (CP), and the union as *augmented visual descriptors* (AVD). We will also refer to their *embeddings* using the same names, which should be clear from the context.

Denote  $M = \sum_{c \in \mathcal{C}} M_c$  where  $\mathcal{C}$  is the set of all classes. The visual descriptors, class prompts, and augmented visual descriptors can be encoded into three matrices  $\mathbf{U}_{\text{vd}} \in \mathbb{R}^{M \times d}$ ,  $\mathbf{U}_{\text{cp}} \in \mathbb{R}^{|\mathcal{C}| \times d}$ ,  $\mathbf{U}_{\text{avd}} \in \mathbb{R}^{(M+|\mathcal{C}|) \times d}$ . Given an image embedding  $\mathbf{z} := f(\mathbf{p})_0 \in \mathbb{R}^d$ , these three matrices respectively created three sets of new features  $\mathbf{h}_{\text{vd}} = \mathbf{U}_{\text{vd}}\mathbf{z}$ ,  $\mathbf{h}_{\text{cp}} = \mathbf{U}_{\text{cp}}\mathbf{z}$ , and  $\mathbf{h}_{\text{avd}} = \mathbf{U}_{\text{avd}}\mathbf{z}$ . Notice that all three  $\mathbf{U}$  matrices are fixed and never trained. We call the action of inner product  $\langle \mathbf{U}, \cdot \rangle$  as “instantiating”. We will also refer to the instantiated features  $\mathbf{h}$  as the (text/language) descriptive features. Given  $\mathbf{h}$ , we can learn three matrices  $\mathbf{W}_{\text{vd}} \in \mathbb{R}^{|\mathcal{C}| \times M}$ ,  $\mathbf{W}_{\text{cp}} \in \mathbb{R}^{|\mathcal{C}| \times |\mathcal{C}|}$ ,  $\mathbf{W}_{\text{avd}} \in \mathbb{R}^{|\mathcal{C}| \times (M+|\mathcal{C}|)}$ .

Setting  $\mathbf{W}_{\text{vd}} = \text{blkdiag} \left( \underbrace{\left( \frac{1}{|M_c|}, \dots, \frac{1}{|M_c|} \right)_{c \in \mathcal{C}}}_{|M_c| \text{ copies}} \right)$ , then  $\mathbf{W}_{\text{vd}}\mathbf{U}_{\text{vd}}$  leads to the average ensemble in

Menon & Vondrick (2022). Setting  $\mathbf{W}_{\text{cp}} = I_{|\mathcal{C}| \times |\mathcal{C}|}$ , we get back the zero-shot classifier  $\mathbf{W}_{\text{zs}} = \mathbf{W}_{\text{cp}}\mathbf{U}_{\text{cp}}$ . One can naturally merge  $\mathbf{W}_{\text{vd}}$  and  $\mathbf{W}_{\text{cp}}$  into  $\mathbf{W}_{\text{avd}} = [\mathbf{W}_{\text{vd}}, \mathbf{W}_{\text{cp}}]$ , which we use in our proposed method. We note that these three  $\mathbf{W}$  matrices can all serve as zero-shot classifiers.

#### 3.2 LEARNING SPARSE ENSEMBLE AND ALIGNING THE IMAGE ENCODER

The previously defined matrix  $\mathbf{U}_{\text{avd}}$  can be viewed as a linear projection of the image embedding onto a  $M + |\mathcal{C}|$  dimensional semantic space. While this space has a high ambient dimension, the projected embeddings live in a low-dimensional manifold that has rank less than or equal to that of the image embedding space. By enforcing a sparsity constraint on  $\mathbf{W}_{\text{avd}}$ , we can select the

most important dimensions among  $\mathbf{h}_{\text{avd}}$ . We demonstrate that the selected subspace is also robust to natural distribution shifts. Intuitively, we imagine that the large distribution shift in the image embedding space only corresponds to a small shift in the semantic space, since the semantics of images should be invariant. We will later demonstrate with mutual information estimations. Further investigation on the property of the semantic space is left to future works.

With a fixed  $\mathbf{U}_{\text{avd}}$ , we learn  $\mathbf{W}_{\text{avd}}$  with  $\ell_1$  regularization  $\|\mathbf{W}_{\text{avd}}\|_1$ . Not only does sparse logistic regression select the important features, but it actually also finds the intuitive features. For example, on CIFAR-10, we demonstrate that the selected features are usually the ones that actually describe that class: for each class, we pick the three features with the largest coefficients, and show that the properly descriptive class features are chosen most often; the results are listed in table 5 in the appendix. After obtaining a sparse  $\widehat{\mathbf{W}}_{\text{avd}}$ , we fix  $\mathbf{U}_{\text{avd}}$  and the *sparsity pattern* of  $\widehat{\mathbf{W}}_{\text{avd}}$ , and finetune both the image encoder  $f$ , as well as the entries in  $\widehat{\mathbf{W}}_{\text{avd}}$ . This process aligns with LP-FT (Kumar et al., 2022), which has some theoretical justification for its robustness.

### 3.3 TEXT DESCRIPTIVE FEATURES ARE COMPRESSIVE AND INVARIANT

Beyond the improvement in performance alone, however, the core of our method relies on the empirical evidence that text descriptive features have many benefits from an information-theoretic perspective. Specifically, we show here that the text descriptive features form more *invariant* and more *compressive* representations of the data than the naive image encoder features. This motivates their use, especially under distribution shift, where we see them outperform the alternatives.

We base our investigation upon two notions: the invariance principle and the information bottleneck. First, the invariance principle from causality (Pearl, 1995) states that the predictors should only rely on the causes of the labels rather than the spurious features. Following this principle, several mutual information (MI) based OOD generalization works (Arjovsky et al., 2019; Zhao et al., 2022; Li et al., 2021; 2022; Zhao et al., 2019; Feng et al., 2021; Ahuja et al., 2021) propose that a good feature representation  $Z$  would have high mutual information with the label,  $I(Z; Y)$ , but low MI with the domain index,  $I(Z; A)$ , so as not to leak information about the domain itself. Closely related is the information bottleneck, which similarly states that a good representation will again have high MI with the label, but low MI with the input  $I(Z; X)$ . In recent years, several works have suggested that combining the invariance principle with the information bottleneck can lead to practical and provably strong OOD generalization (Ahuja et al., 2021; Li et al., 2022).

We demonstrate that the text descriptive features essentially obey both the tenets of the invariance principle and the information bottleneck: the extracted text features  $H$  have high MI with the labels, but substantially lower MI with both the domain index and the input itself. The features of our framework correspond to the following Markov chain:

$$Y \rightarrow X \xrightarrow{f(\cdot)_0} Z \xrightarrow{\mathbf{U}} H \xrightarrow{\mathbf{W}} \hat{Y}, \quad (1)$$

where  $\mathbf{y} \sim Y$ ,  $\mathbf{p} \sim X$ ,  $\mathbf{z} \sim Z$ ,  $\mathbf{h} \sim H$ ,  $\hat{\mathbf{y}} \sim \hat{Y}$  corresponds to realizations of the truth labels, the input images, the image embeddings, the text descriptive features, and the predictions (the capital letters are random variables) respectively. Here  $\mathbf{W}, \mathbf{U}, \mathbf{h}$  and  $H$  can be subscripted by avd, vd, cp as in section 3. We will use  $A$  for the domain index.

By the Data Processing Inequality (DPI, Cover (1999)), we immediately have that  $I(X; Y) \geq I(Z; Y) \geq I(H; Y)$ . Additionally, however, we also observe for the text descriptive features  $I(H; Y)$  is nearly as large as  $I(Z; Y)$  (i.e., there is not much decrease in the information about the label), but  $I(H; A)$  and  $I(H; X)$  are substantially lower than  $I(Z; A)$  and  $I(Z; X)$  (i.e, the text descriptive features leak much less information about the label and the input).

To assess this, we conduct numerical evaluations on CIFAR-10 (Krizhevsky et al., 2009), CIFAR-10.1 (Recht et al., 2018), and CIFAR-10.2 (Lu et al., 2020). We index these three datasets, denoting the index random variable as  $A$ . We compute the image embedding  $\mathbf{z}$  and the instantiated descriptive feature  $\mathbf{h}$  for every image in these three test sets. To estimate mutual information, we use the SMILE estimator (Song & Ermon, 2019). The numerical estimation is presented in fig. 2. MI is estimated for two sets of text descriptive features:  $\mathbf{h}_{\text{cp}} \sim H_{\text{cp}}$  and  $\mathbf{h}_{\text{avd}} \sim H_{\text{avd}}$ . Importantly,  $H_{\text{cp}}$  should be viewed as a post-processing of  $H_{\text{avd}}$ . Intuitively, we see that  $I(Z; Y) > I(H_{\text{avd}}; Y) > I(H_{\text{cp}}; Y)$  by DPI. We also see that  $I(Z; A) > I(H_{\text{avd}}; A) > I(H_{\text{cp}}; A)$ , which suggests that

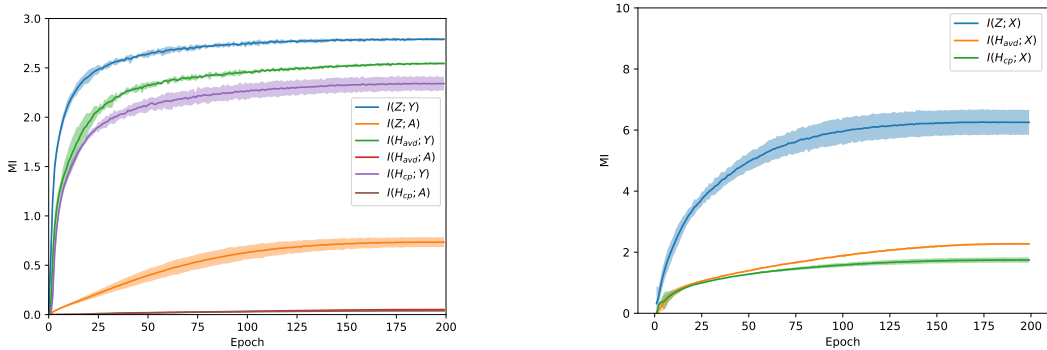

Figure 2: The MI estimations at interest. The estimator is variational and we include the whole optimization trajectory. **Left:** the MI between a different set of features and the labels or the domain indices. **Right:** the MI between a different set of features and the input images.

the text descriptive features  $h$  are much more invariant to the distribution shift. The noticeable gap between  $I(H_{\text{avd}}, Y)$  and  $I(H_{\text{cp}}, Y)$  explains why it is beneficial to work with text descriptive features beyond vanilla zero-shot classification.

From the information bottleneck perspective, Figure 2 also presents that  $I(X; H_{\text{avd}}) < I(X; Z)$  by a large margin, we can then interpret  $H_{\text{avd}}$  as a “better” compression of the input image  $X$ , in the sense that it preserves only information in  $X$  that is helpful for predicting  $Y$ . Of course, this also means that one cannot reconstruct  $X$  from  $H_{\text{avd}}$  better than from  $Z$ , although this is an orthogonal goal to ours. Typically better input compressions lead to smaller generalization error. Under mild conditions one can bound the generalization error of feature  $Z$  with probability at least  $1 - \delta$ :  $\text{GenErr} \leq \sqrt{\frac{2^{I(X; Z)} + \log(2/\delta)}{n}}$ , where  $n$  is the number of training samples (Shwartz-Ziv et al., 2018). Intuitively, if the features have small MI with the inputs, then the perturbation in the input space cannot perturb the features too much, hence constraining the expressiveness of the features. Since  $I(H_{\text{avd}}; X)$  is significantly smaller than  $I(Z; X)$ , we can expect a more predictable test performance (compared to the training performance). On the other hand, high  $I(H_{\text{avd}}; Y)$  makes sure that the accuracy will not be too low. The synergy of the two notions elucidates the superiority of AVD in the few-shot setting.

## 4 EXPERIMENT

Throughout the experiments, we focus on the few-shot setting. We test our method on ImageNet, ImageNet-R, ImageNet-V2, ImageNet-A, ImageNet-Sketch, and ObjectNet (Deng et al., 2009; Hendrycks et al., 2021a;b; Recht et al., 2019; Wang et al., 2019; Barbu et al., 2019), demonstrating the superiority of the sparsely learned visual descriptors ensemble. By default, we use the ViT-B/16 model unless otherwise specified. The hand-crafted templates for ImageNet classes contain a set of seven prompts suggested in <https://github.com/openai/CLIP>: 1. “itap of a {}.” 2. “a bad photo of the {}.” 3. “a origami {}.” 4. “a photo of the large {}.” 5. “a {} in a video game.” 6. “art of the {}.” 7. “a photo of the small {}.” This set usually outperforms the original 80 templates in Radford et al. (2021).

For simplicity, we will use the following acronyms for different methods and datasets. We defer the hyperparameter discussions to the appendix.

**ZS:** Zero-shot classification using text embeddings of hand-crafted prompts ensembles. **ZS-VD,** **ZS-AVD:** Zero-shot classification using visual descriptor and augmented visual descriptors, respectively. **LP:** Linear probing using image embeddings. **SLR-AVD:** Sparse logistic regression using AVDs. **FT:** Finetuning the image encoder and classification head. **SLR-FT-AVD:** Sparse logistic regression with AVD, and then finetune the linear head plus the image encoder with frozen sparsity patterns. **WISE-FT:** Weight ensemble using ZS and FT. **WISE-SLR:** Weight ensemble using SLR-FT-AVD and ZS-AVD. **IN:** ImageNet. **IN-R:** ImageNet-R. **IN-A:** ImageNet-A. **IN-V2:** ImageNetV2. **IN-Sketch:** ImageNet-Sketch.

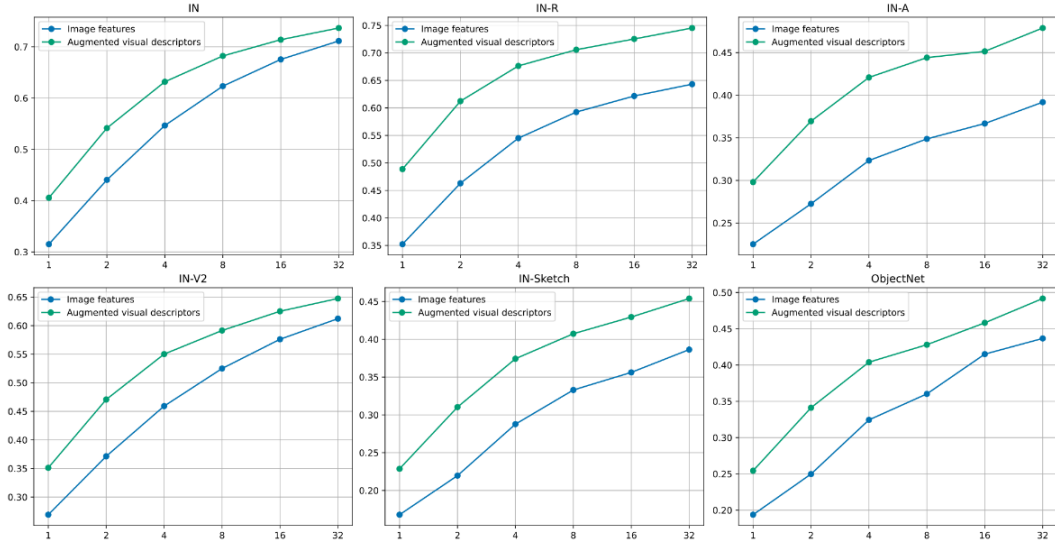

Figure 3: Few-shot experiments compare LP vs SLR-AVD. In each subfigure, the y-axis represents the number of shots per class. Here we consider shot in  $\{1, 2, 4, 8, 16, 32\}$  shots per class. SLR-AVD is more sample efficient in the in-distribution reference and is also much more robust to several distribution shifts.

Table 1: Accuracies of zero-shot, visual descriptors, and augmented visual descriptors on ImageNet and its variations. ZS-AVD outperforms all baselines across different datasets.

|           | ZS    | ZS-VD | ZS-AVD       |
|-----------|-------|-------|--------------|
| IN        | 68.78 | 65.89 | <b>69.52</b> |
| IN-V2     | 62.23 | 59.19 | <b>62.97</b> |
| IN-R      | 77.72 | 72.75 | <b>77.85</b> |
| IN-A      | 50.64 | 46.11 | <b>50.87</b> |
| IN-Sketch | 48.38 | 44.84 | <b>48.91</b> |
| ObjectNet | 54.31 | 49.60 | <b>54.58</b> |

Table 2: WISE-FT vs. WISE-SLR accuracies on ImageNet and its variations with optimal  $\alpha$ .

| Shot               | $k = 1$ |       | $k = 2$ |       | $k = 4$ |       |
|--------------------|---------|-------|---------|-------|---------|-------|
|                    | FT      | SLR   | FT      | SLR   | FT      | SLR   |
| IN                 | 68.88   | 70.31 | 69.59   | 71.21 | 70.48   | 72.09 |
| Average $\uparrow$ | 1.43    |       | 1.62    |       | 1.61    |       |
| IN-R               | 77.82   | 78.29 | 78.13   | 78.53 | 78.32   | 78.59 |
| IN-A               | 50.09   | 51.29 | 50.43   | 51.51 | 52.11   | 52.64 |
| IN-V2              | 62.32   | 63.74 | 63.07   | 64.37 | 63.50   | 65.30 |
| IN-Sketch          | 48.45   | 49.35 | 48.75   | 49.63 | 48.99   | 49.92 |
| ObjectNet          | 54.52   | 54.94 | 55.01   | 54.99 | 55.77   | 55.41 |
| Average $\uparrow$ | 0.88    |       | 0.73    |       | 0.64    |       |

#### 4.1 ZERO-SHOT WITH AVDS

As mentioned in section 3.1, we can easily establish zero-shot matrices with AVDs. We set  $\mathbf{W}_{vd}$  to be the aforementioned block diagonal form,  $\mathbf{W}_{cp}$  to be an identity matrix. We merge them into  $\mathbf{W}_{avd} = [\mathbf{W}_{vd}, \gamma \mathbf{W}_{cp}]$ . Their performances are compared in table 1. ZS-AVD outperforms every zero-shot baseline on all ImageNet variations. We find that simply using VD usually underperforms ZS, indicating that the class names are probably one of the strongest prompts. This observation is intuitive as during contrastive training, the class name itself is likely to show up in the caption the most often, compared to other visual descriptors. One can certainly try to improve ZS-VD results by more carefully prompting GPT-3, or gathering descriptors from different data sources/search engines. Pratt et al. (2022); Yang et al. (2022); Menon & Vondrick (2022) have studied the quality of descriptors across different datasets and hyperparameters (e.g. temperature for sampling, etc) settings. Here, we do not further pursue this direction. Instead, we utilize our observation that simply using the merged prompts  $\mathbf{W}_{avd}$  already surpasses the best zero-shot classifier. Notice here we have a parameter  $\gamma$  that decides how much we weight the zero-shot model. Empirically we find that setting  $\gamma = 5$  is sufficient for all datasets. We conduct small-scale experiments on CIFAR-10 and its variations to further investigate the influence of difference choice of  $\gamma$ , the GPT prompts, and the GPT sampling hyperparameters. We find these choices typically do not lead to significant deviations

Table 3: Accuracies on ImageNet and its variation. We compare LP vs SLR-AVD.

| Shots              | $k = 1$ |              | $k = 2$ |              | $k = 4$ |              | $k = 8$ |              | $k = 16$ |              | $k = 32$ |              |
|--------------------|---------|--------------|---------|--------------|---------|--------------|---------|--------------|----------|--------------|----------|--------------|
| Methods            | LP      | AVD          | LP      | AVD          | LP      | AVD          | LP      | AVD          | LP       | AVD          | LP       | AVD          |
| IN                 | 31.51   | <b>40.56</b> | 44.06   | <b>54.16</b> | 54.66   | <b>63.19</b> | 62.33   | <b>68.23</b> | 67.55    | <b>71.40</b> | 71.15    | <b>73.67</b> |
| IN-R               | 35.23   | <b>48.88</b> | 46.30   | <b>61.23</b> | 54.50   | <b>67.64</b> | 59.25   | <b>70.58</b> | 62.16    | <b>72.54</b> | 64.32    | <b>74.53</b> |
| IN-A               | 22.52   | <b>29.81</b> | 27.26   | <b>36.96</b> | 32.34   | <b>42.09</b> | 34.88   | <b>44.41</b> | 36.68    | <b>45.15</b> | 39.19    | <b>47.89</b> |
| IN-V2              | 26.91   | <b>35.12</b> | 37.13   | <b>47.07</b> | 45.92   | <b>55.02</b> | 52.50   | <b>59.15</b> | 57.62    | <b>62.52</b> | 61.23    | <b>64.75</b> |
| IN-Sketch          | 16.80   | <b>22.87</b> | 21.96   | <b>31.03</b> | 28.77   | <b>37.43</b> | 33.29   | <b>40.73</b> | 35.62    | <b>42.94</b> | 38.64    | <b>45.39</b> |
| ObjectNet          | 19.38   | <b>25.43</b> | 24.98   | <b>34.11</b> | 32.44   | <b>40.39</b> | 36.02   | <b>42.80</b> | 41.50    | <b>45.82</b> | 43.67    | <b>49.17</b> |
| Average $\uparrow$ | 8.39    |              | 10.48   |              | 9.52    |              | 7.94    |              | 6.54     |              | 6.20     |              |

in test accuracies unless the generated visual descriptors are too repetitive, see the appendix for details.

#### 4.2 COMPARISON TO LINEAR PROBING

We compare SLR-AVD to LP with  $\{1, 2, 4, 8, 16, 32\}$  shots per class. Each experiment is conducted 3 times with independent random seeds. We report the averaged test accuracy on ImageNet and its distribution shift variations, see fig. 3 for details. Our proposed method outperforms linear probing on all tasks. Detailed accuracies are presented in table 3. In a nutshell, our method outperforms linear probing by 8.39%, 10.48%, 9.52%, 7.94%, 6.54%, 6.20% on  $k = 1, 2, 4, 8, 16, 32$  respectively.

Although learning with visual descriptors significantly outperforms linear probing in the few-shot setting, we should remark that ImageNet and its variations are usually considered “in-distribution” to the CLIP training data. In this case, the zero-shot model itself is usually a very strong baseline, and typically outperforms few-shot models, as can be observed by comparing the results in table 1 and table 3. WISE-FT serves as a strong method to improve both in-distribution and out-of-distribution accuracies. We can apply WISE-FT to any of our existing settings, including SLR-AVD and LP. In particular, we can train a linear head (and/or image encoder, depending on the setting)  $\mathbf{W}_{\text{learned}}$ , and interpolate with the zero-shot weight  $\mathbf{W}_{\text{zs}}$  by taking a convex combination  $\alpha \mathbf{W}_{\text{zs}} + (1 - \alpha) \mathbf{W}_{\text{learned}}$ , for  $\alpha \in \{\alpha_1, \dots, \alpha_n\}$ . We are free to vary  $\alpha$ . Then for each  $\alpha_i$ , we can plot that weight ensemble’s ID and OOD test accuracy. This procedure thus creates an ID-OOD frontier and along the curve, some ensemble excels at both ID and OOD distribution. We further show that WISE-FT+SLR-SVD dominates WISE-FT+LP. See the ID-OOD curves in fig. 4. We show the plot of  $k = 4, 8, 16$ . SLR-AVD’s ID-OOD curve overwhelms that of LP, indicating that SLR-AVD is better at both ID and OOD tasks.

#### 4.3 COMPARISON TO FINETUNING

We compare WISE-FT where we additionally interpolate the image encoder, to WISE-SLR, an interpolation between SLR-FT-AVD and ZS-AVD. The ID-OOD frontier is presented in fig. 4 and the accuracies are reported in table 2.

On the ID task, WISE-SLR outperforms vanilla WISE-FT by 1.43%, 1.62%, and 1.61% respectively with  $k = 1, 2, 4$  shot training data. Averaging over 5 distribution shift datasets, with optimal  $\alpha$ , WISE-SLR outperforms vanilla WISE-FT by 0.88%, 0.73%, and 0.64% respectively for  $k = 1, 2, 4$ . The optimal  $\alpha$  is picked independently for each method on each dataset.

#### 4.4 COMPARISON TO COOP

We compare linear probing with AVD to CoOp (Zhou et al., 2022b) as well. CoOp learns the prefix of “[prefix] {classname}” in the continuous token embedding space. The benefit of CoOp is that it operates in a continuous space, hence one can optimize using standard backpropagation, and it is quite computationally efficient. On the other hand, due to the requirement of backprop, CoOp stores a large computation graph, hence memory-efficiency is a big advantage of SLR-AVD over CoOp.



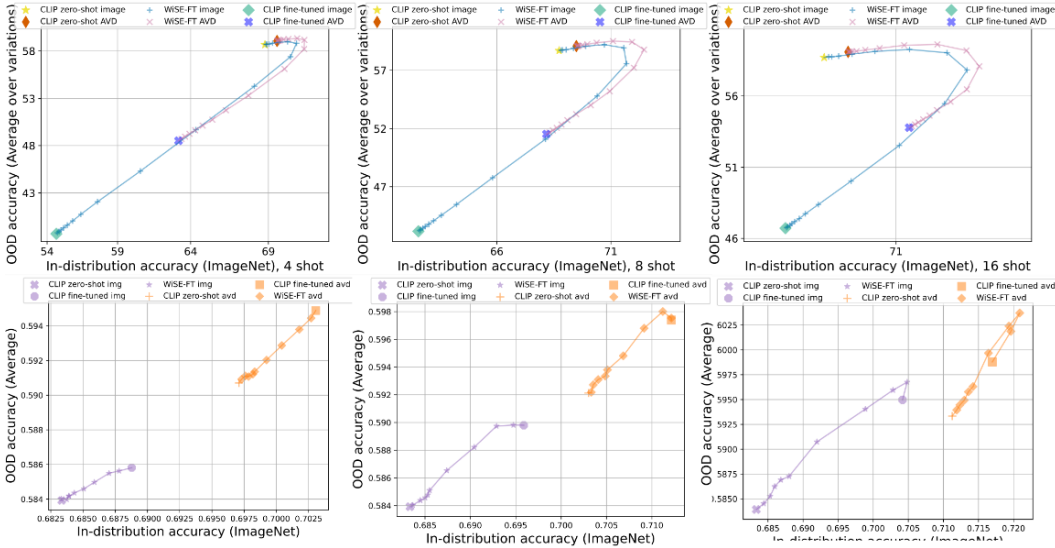

Figure 4: **Top:** ID-OOD accuracy curve of WISE-FT+LP vs WISE-FT+SLR-AVD. ID is tested on ImageNet, and OOD is averaged over 5 ImageNet variations. Experiments with [4, 8, 16]-shots are presented. Each accuracy is averaged over 3 runs. We can see that our proposed method overwhelms LP in all cases. **Bottom:** ID-OOD accuracy curve of WISE-FT vs WISE-SLR. ID is tested on ImageNet, and OOD is averaged over 5 ImageNet variations. Experiments with [1, 2, 4]-shots are presented. Each accuracy is averaged over 3 runs. We can see that our proposed method overwhelms WISE-FT in all cases.

When implementing CoOp, we choose a prefix of length 16 and do not use a suffix. The prefix is fixed for all classes. We train with Adam for 20 epochs, setting the batch size to 512. This gives us comparable results to those of the original paper.

Since CoOp injects “classname” to the prompt during inference directly, this enforces a very strong prior. For a fair comparison, we also inject a strong prior by interpolating our learned linear head  $\alpha \mathbf{W}_{\text{avd}} + (1 - \alpha) \mathbf{W}_{\text{zs}}$  with the zero-shot linear classifier. We use  $\alpha = 0.05k$  where  $k$  is the number of shots. Resnet-50 vision backbone is used for both methods. See the result in table 4. SLR-AVD exceeds CoOp by 1.73, 1.49, 1.55, 1.53, 1.95 on  $k = 1, 2, 4, 8, 16$ , respectively.

Table 4: Accuracies of CoOp and SLR-AVD on ImageNet. For SLR-AVD, we interpolate the learned weights with zero-shot weights by  $\alpha \mathbf{W}_{\text{avd}} + (1 - \alpha) \mathbf{W}_{\text{zs}}$ , where  $\alpha = 0.05k$  and  $k$  is shots per class.

| Shots    | 1     | 2     | 4     | 8     | 16    |
|----------|-------|-------|-------|-------|-------|
| CoOp     | 59.54 | 60.23 | 60.97 | 62.20 | 63.02 |
| AVD      | 61.27 | 61.72 | 62.52 | 63.73 | 64.97 |
| $\Delta$ | +1.73 | +1.49 | +1.55 | +1.53 | +1.95 |

## 5 CONCLUSION

Motivated by the invariance principle and information bottleneck, we present how to leverage descriptive features for image learning in the few-shot setting robustly. These descriptive features can be easily obtained from LLMs. Applying sparse logistic regression then successfully selects the important features, which turn out to be intuitive. Our proposed method outperforms linear probing and standard finetuning in both ID and OOD tasks, with or without combining with WISE-FT. This approach helps us further understand the CLIP embedding space and how the semantics serve as a strong robust prior. Moving forward, it is important to understand and quantify the robustness of the visual descriptors’ space and compare it to the image embedding space statistically. From the practical side, this work aligns image encoders to a fixed text encoder; it is valuable to study how to simultaneously align both encoders in a robust way.

## REFERENCES

- Kartik Ahuja, Ethan Caballero, Dinghuai Zhang, Jean-Christophe Gagnon-Audet, Yoshua Bengio, Ioannis Mitliagkas, and Irina Rish. Invariance principle meets information bottleneck for out-of-distribution generalization. *Advances in Neural Information Processing Systems*, 34:3438–3450, 2021.
- Martin Arjovsky, Léon Bottou, Ishaan Gulrajani, and David Lopez-Paz. Invariant risk minimization. *arXiv preprint arXiv:1907.02893*, 2019.
- Sanjeev Arora, Rong Ge, Behnam Neyshabur, and Yi Zhang. Stronger generalization bounds for deep nets via a compression approach. In *International Conference on Machine Learning*, pp. 254–263. PMLR, 2018.
- Andrei Barbu, David Mayo, Julian Alverio, William Luo, Christopher Wang, Dan Gutfreund, Josh Tenenbaum, and Boris Katz. Objectnet: A large-scale bias-controlled dataset for pushing the limits of object recognition models. *Advances in neural information processing systems*, 32, 2019.
- Léonard Blier and Yann Ollivier. The description length of deep learning models. *Advances in Neural Information Processing Systems*, 31, 2018.
- Avrim Blum and John Langford. Pac-mdl bounds. In *Learning Theory and Kernel Machines: 16th Annual Conference on Learning Theory and 7th Kernel Workshop, COLT/Kernel 2003, Washington, DC, USA, August 24-27, 2003. Proceedings*, pp. 344–357. Springer, 2003.
- Guangyi Chen, Weiran Yao, Xiangchen Song, Xinyue Li, Yongming Rao, and Kun Zhang. Prompt learning with optimal transport for vision-language models. *arXiv preprint arXiv:2210.01253*, 2022.
- Thomas M Cover. *Elements of information theory*. John Wiley & Sons, 1999.
- Aaron Defazio, Francis Bach, and Simon Lacoste-Julien. Saga: A fast incremental gradient method with support for non-strongly convex composite objectives. *Advances in neural information processing systems*, 27, 2014.
- Jia Deng, Wei Dong, Richard Socher, Li-Jia Li, Kai Li, and Li Fei-Fei. Imagenet: A large-scale hierarchical image database. In *2009 IEEE conference on computer vision and pattern recognition*, pp. 248–255. Ieee, 2009.
- Zhili Feng, Shaobo Han, and Simon S Du. Provable adaptation across multiway domains via representation learning. *arXiv preprint arXiv:2106.06657*, 2021.
- Angus Galloway, Anna Golubeva, Mahmoud Salem, Mihai Nica, Yani Ioannou, and Graham W Taylor. Bounding generalization error with input compression: An empirical study with infinite-width networks. *arXiv preprint arXiv:2207.09408*, 2022.
- Sachin Goyal, Ananya Kumar, Sankalp Garg, Zico Kolter, and Aditi Raghunathan. Finetune like you pretrain: Improved finetuning of zero-shot vision models. *arXiv preprint arXiv:2212.00638*, 2022.
- Dan Hendrycks, Steven Basart, Norman Mu, Saurav Kadavath, Frank Wang, Evan Dorundo, Rahul Desai, Tyler Zhu, Samyak Parajuli, Mike Guo, et al. The many faces of robustness: A critical analysis of out-of-distribution generalization. In *Proceedings of the IEEE/CVF International Conference on Computer Vision*, pp. 8340–8349, 2021a.
- Dan Hendrycks, Kevin Zhao, Steven Basart, Jacob Steinhardt, and Dawn Song. Natural adversarial examples. In *Proceedings of the IEEE/CVF Conference on Computer Vision and Pattern Recognition*, pp. 15262–15271, 2021b.
- Daniel Khoshabi, Shane Lyu, Sewon Min, Lianhui Qin, Kyle Richardson, Sameer Singh, Sean Welleck, Hannaneh Hajishirzi, Tushar Khot, Ashish Sabharwal, et al. Prompt waywardness: The curious case of discretized interpretation of continuous prompts. *arXiv preprint arXiv:2112.08348*, 2021.

- Pang Wei Koh, Shiori Sagawa, Henrik Marklund, Sang Michael Xie, Marvin Zhang, Akshay Bal-subramani, Weihua Hu, Michihiro Yasunaga, Richard Lanus Phillips, Irena Gao, et al. Wilds: A benchmark of in-the-wild distribution shifts. In *International Conference on Machine Learning*, pp. 5637–5664. PMLR, 2021.
- Alex Krizhevsky, Geoffrey Hinton, et al. Learning multiple layers of features from tiny images. 2009.
- Ananya Kumar, Aditi Raghunathan, Robbie Jones, Tengyu Ma, and Percy Liang. Fine-tuning can distort pretrained features and underperform out-of-distribution. *arXiv preprint arXiv:2202.10054*, 2022.
- Bo Li, Yezhen Wang, Shanghang Zhang, Dongsheng Li, Kurt Keutzer, Trevor Darrell, and Han Zhao. Learning invariant representations and risks for semi-supervised domain adaptation. In *Proceedings of the IEEE/CVF Conference on Computer Vision and Pattern Recognition*, pp. 1104–1113, 2021.
- Bo Li, Yifei Shen, Yezhen Wang, Wenzhen Zhu, Dongsheng Li, Kurt Keutzer, and Han Zhao. Invariant information bottleneck for domain generalization. In *Proceedings of the AAAI Conference on Artificial Intelligence*, volume 36, pp. 7399–7407, 2022.
- Shangyun Lu, Bradley Nott, Aaron Olson, Alberto Todeschini, Hossein Vahabi, Yair Carmon, and Ludwig Schmidt. Harder or different? a closer look at distribution shift in dataset reproduction. In *ICML Workshop on Uncertainty and Robustness in Deep Learning*, volume 5, pp. 15, 2020.
- Yuning Lu, Jianzhuang Liu, Yonggang Zhang, Yajing Liu, and Xinmei Tian. Prompt distribution learning. In *Proceedings of the IEEE/CVF Conference on Computer Vision and Pattern Recognition*, pp. 5206–5215, 2022.
- Sachit Menon and Carl Vondrick. Visual classification via description from large language models. *arXiv preprint arXiv:2210.07183*, 2022.
- Shay Moran and Amir Yehudayoff. Sample compression schemes for vc classes. *Journal of the ACM (JACM)*, 63(3):1–10, 2016.
- Judea Pearl. Causal diagrams for empirical research. *Biometrika*, 82(4):669–688, 1995.
- Sarah Pratt, Rosanne Liu, and Ali Farhadi. What does a platypus look like? generating customized prompts for zero-shot image classification. *arXiv preprint arXiv:2209.03320*, 2022.
- Alec Radford, Jong Wook Kim, Chris Hallacy, Aditya Ramesh, Gabriel Goh, Sandhini Agarwal, Girish Sastry, Amanda Askell, Pamela Mishkin, Jack Clark, et al. Learning transferable visual models from natural language supervision. In *International Conference on Machine Learning*, pp. 8748–8763. PMLR, 2021.
- Benjamin Recht, Rebecca Roelofs, Ludwig Schmidt, and Vaishal Shankar. Do cifar-10 classifiers generalize to cifar-10? *arXiv preprint arXiv:1806.00451*, 2018.
- Benjamin Recht, Rebecca Roelofs, Ludwig Schmidt, and Vaishal Shankar. Do imagenet classifiers generalize to imagenet? In *International conference on machine learning*, pp. 5389–5400. PMLR, 2019.
- Elan Rosenfeld, Pradeep Ravikumar, and Andrej Risteski. The risks of invariant risk minimization. *arXiv preprint arXiv:2010.05761*, 2020.
- Ravid Shwartz-Ziv, Amichai Painsky, and Naftali Tishby. Representation compression and generalization in deep neural networks, 2018.
- Jiaming Song and Stefano Ermon. Understanding the limitations of variational mutual information estimators. *arXiv preprint arXiv:1910.06222*, 2019.
- Naftali Tishby and Noga Zaslavsky. Deep learning and the information bottleneck principle. In *2015 IEEE information theory workshop (itw)*, pp. 1–5. IEEE, 2015.

- Haohan Wang, Songwei Ge, Zachary Lipton, and Eric P Xing. Learning robust global representations by penalizing local predictive power. *Advances in Neural Information Processing Systems*, 32, 2019.
- Yuxin Wen, Neel Jain, John Kirchenbauer, Micah Goldblum, Jonas Geiping, and Tom Goldstein. Hard prompts made easy: Gradient-based discrete optimization for prompt tuning and discovery. *arXiv preprint arXiv:2302.03668*, 2023.
- Eric Wong, Shibani Santurkar, and Aleksander Madry. Leveraging sparse linear layers for debuggable deep networks. In *International Conference on Machine Learning*, pp. 11205–11216. PMLR, 2021.
- Mitchell Wortsman, Gabriel Ilharco, Jong Wook Kim, Mike Li, Simon Kornblith, Rebecca Roelofs, Raphael Gontijo Lopes, Hannaneh Hajishirzi, Ali Farhadi, Hongseok Namkoong, et al. Robust fine-tuning of zero-shot models. In *Proceedings of the IEEE/CVF Conference on Computer Vision and Pattern Recognition*, pp. 7959–7971, 2022.
- Yue Yang, Artemis Panagopoulou, Shenghao Zhou, Daniel Jin, Chris Callison-Burch, and Mark Yatskar. Language in a bottle: Language model guided concept bottlenecks for interpretable image classification. *arXiv preprint arXiv:2211.11158*, 2022.
- Han Zhao, Remi Tachet Des Combes, Kun Zhang, and Geoffrey Gordon. On learning invariant representations for domain adaptation. In *International conference on machine learning*, pp. 7523–7532. PMLR, 2019.
- Han Zhao, Chen Dan, Bryon Aragam, Tommi S Jaakkola, Geoffrey J Gordon, and Pradeep Ravikumar. Fundamental limits and tradeoffs in invariant representation learning. *The Journal of Machine Learning Research*, 23(1):15356–15404, 2022.
- Kaiyang Zhou, Jingkang Yang, Chen Change Loy, and Ziwei Liu. Conditional prompt learning for vision-language models. In *Proceedings of the IEEE/CVF Conference on Computer Vision and Pattern Recognition*, pp. 16816–16825, 2022a.
- Kaiyang Zhou, Jingkang Yang, Chen Change Loy, and Ziwei Liu. Learning to prompt for vision-language models. *International Journal of Computer Vision*, 130(9):2337–2348, 2022b.
- Beier Zhu, Yulei Niu, Yucheng Han, Yue Wu, and Hanwang Zhang. Prompt-aligned gradient for prompt tuning. *arXiv preprint arXiv:2205.14865*, 2022.

## A APPENDIX

**Hyperparameter** For ImageNet and its variations, we fix a set of 6804 augmented visual descriptors. The hyperparameters are swept over disjoint training and validation sets of size 20 per class for LP and SLR-AVD. For  $\ell_1$  regularization, its non-smoothness makes it notoriously hard for auto-differentiation. To circumvent the smoothness issue, we apply the GPU implementation (Wong et al., 2021) of a variance-reduction proximal gradient method SAGA (Defazio et al., 2014). We adopt the *regularization path* approach, in which the solver optimizes over 100 regularization strengths  $\lambda_1 > \lambda_2 \cdots > \lambda_{100}$ . Here we set  $\lambda_1$  to be the strength that returns a model that uses none of the features, and  $\lambda_{100} = 0.1 \times \lambda_1$ . For LP, we always use  $\ell_2$  regularization, we use L-BFGS implemented by scikit-learn, and search for the regularization strength over 100 grids between 0.5 and 6. All the  $\lambda$ s are evenly spread in the log-space<sup>1</sup>. For FT and SLR-FT-AVD, we select hyperparameters using a training and validation set of size 4 per class. The batch size is fixed to be 512 and the number of epochs is fixed to be 10. We always optimize with AdamW, and choose a cosine rate scheduler with warm-ups. We randomly select learning rate in  $[1e - 8, 3e - 5]$ , weight decay in  $[0.1, 0.12]$ , and warm up steps in  $\{0, 50, 500\}$ , for 20 trials. The chosen parameters are then fixed throughout all experiments.

As a recap, we use the following acronyms for different methods and datasets:

**ZS:** Zero-shot classification using text embeddings of hand-crafted prompts ensembles.

**ZS-VD, ZS-AVD:** Zero-shot classification using visual descriptor and augmented visual descriptors, respectively.

**LP:** Linear probing using image embeddings.

**SLR-AVD:** Sparse logistic regression using AVDs.

**FT:** Finetuning the image encoder and classification head.

**SLR-FT-AVD:** Sparse logistic regression with AVD, and then finetune the linear head plus the image encoder with frozen sparsity patterns.

**WISE-FT:** Weight ensemble using ZS and FT.

**WISE-SLR:** Weight ensemble using SLR-FT-AVD and ZS-AVD.

**IN:** ImageNet.

**IN-R:** ImageNet-R.

**IN-A:** ImageNet-A.

**IN-V2:** ImageNetV2.

**IN-Sketch:** ImageNet-Sketch.

The dataset-wise ID-OOD curves of LP vs SLR-AVD on IN-A, IN-R, IN-V2, IN-Sketch, and ObjectNet are listed in figs. 5 to 9, respectively.

The dataset-wise ID-OOD curves of WISE-FT vs WISE-SLR on IN-A, IN-R, IN-V2, IN-Sketch, and ObjectNet are listed in figs. 10 to 14, respectively.

The detailed accuracies of WISE-FT vs WISE-SLR with different choices of  $\alpha$  are given in table 9 (ID) and table 8 (OOD).  $\alpha = 0$  corresponds to zero-shot accuracy, and  $\alpha = 1$  corresponds to full fine-tuned model. The results in the same setting with only the last linear layer trained are presented in table 6 (ID) and table 7 (OOD).

<sup>1</sup>In python `numpy.logspace(math.log10( $\lambda_1$ ), math.log10( $\lambda_{100}$ ), 100)`

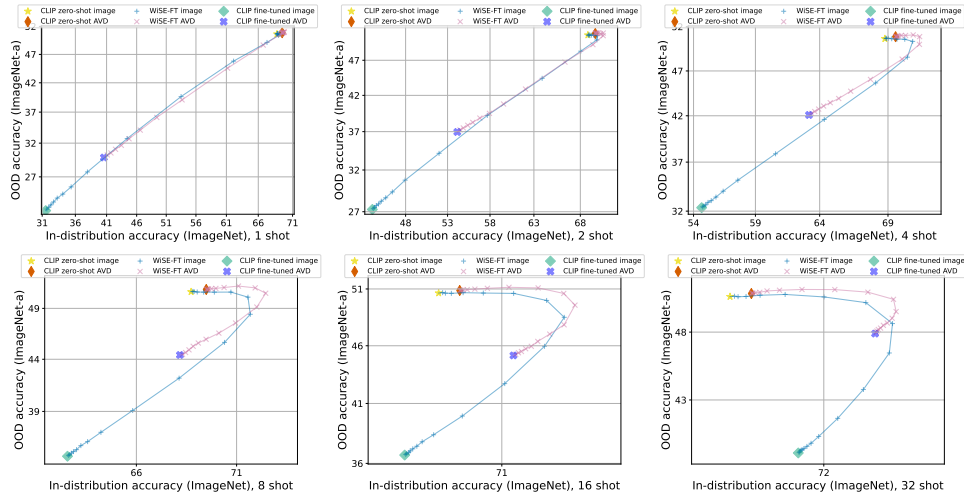

Figure 5: ID-OOD curves of LP vs SLR-AVD on IN-A.  $k = 1, 2, 4, 8, 16, 32$ .

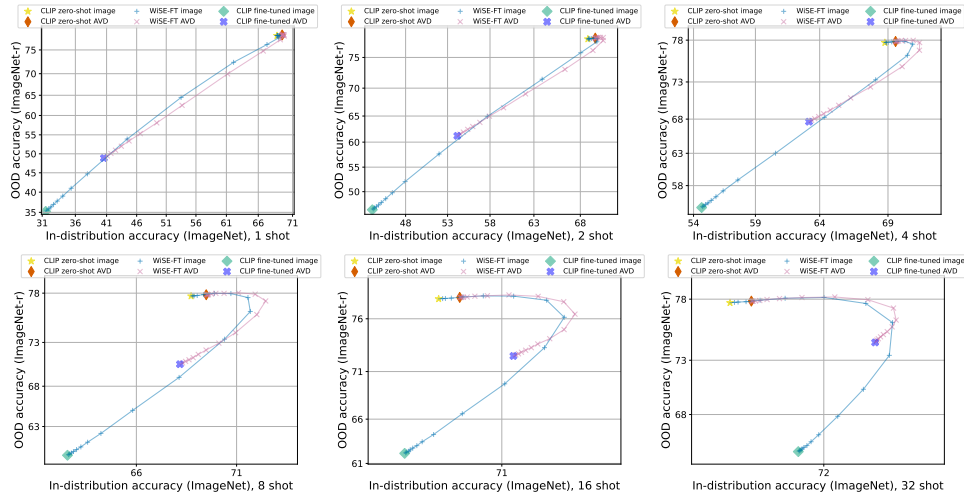

Figure 6: ID-OOD curves of LP vs SLR-AVD on IN-R.  $k = 1, 2, 4, 8, 16, 32$ .

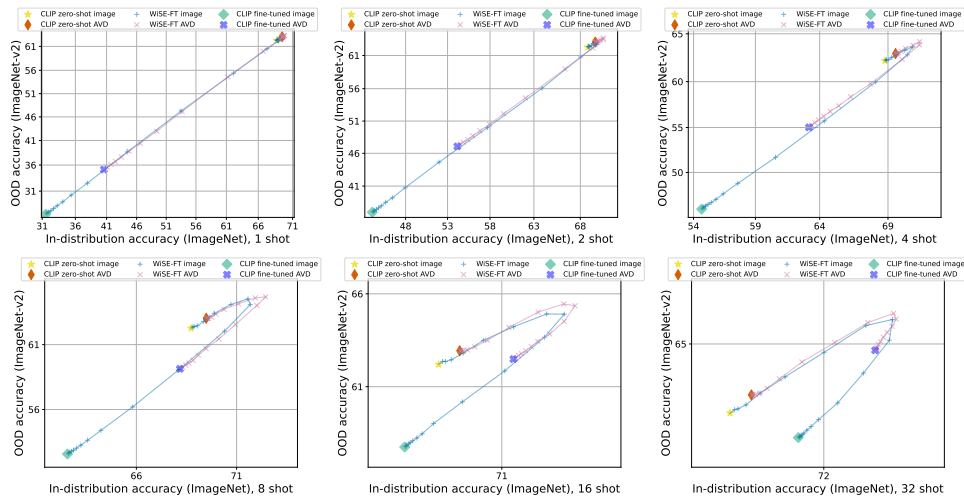

Figure 7: ID-OOD curves of LP vs SLR-AVD on IN-V2.  $k = 1, 2, 4, 8, 16, 32$ .

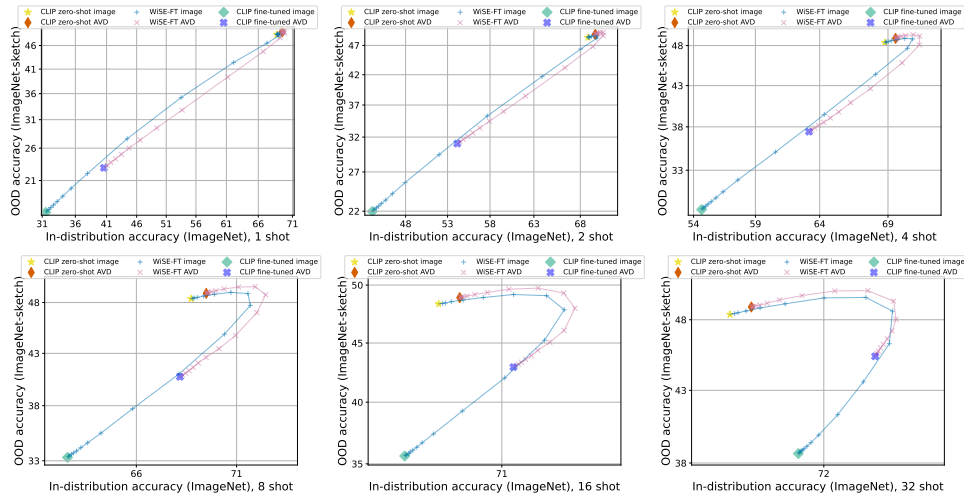

Figure 8: ID-OOD curves of LP vs SLR-AVD on IN-Sketch.  $k = 1, 2, 4, 8, 16, 32$ .

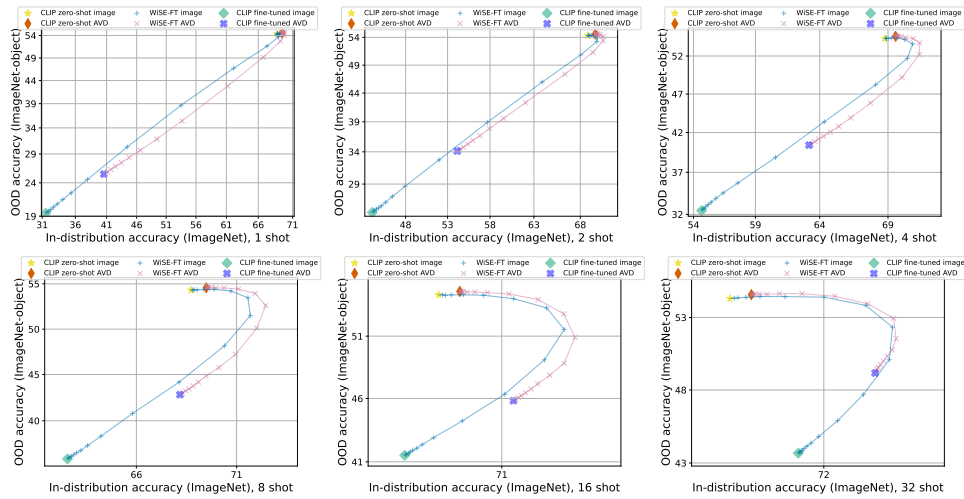

Figure 9: ID-OOD curves of LP vs SLR-AVD on ObjectNet.  $k = 1, 2, 4, 8, 16, 32$ .

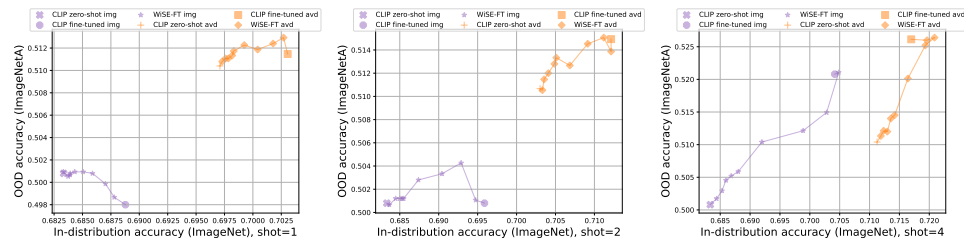

Figure 10: ID-OOD curves of WISE-FT vs WISE-SLR on IN-A.  $k = 1, 2, 4$ .

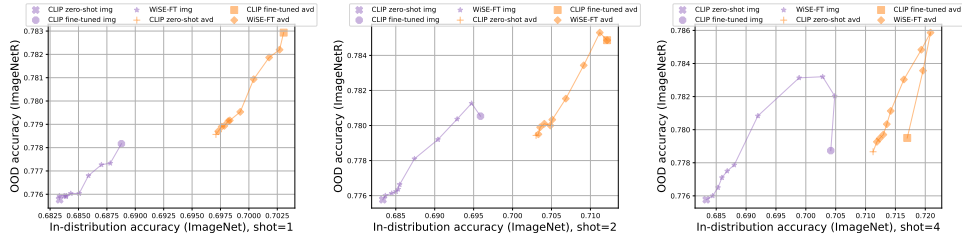

Figure 11: ID-OOD curves of WISE-FT vs WISE-SLR on IN-R.  $k = 1, 2, 4$ .

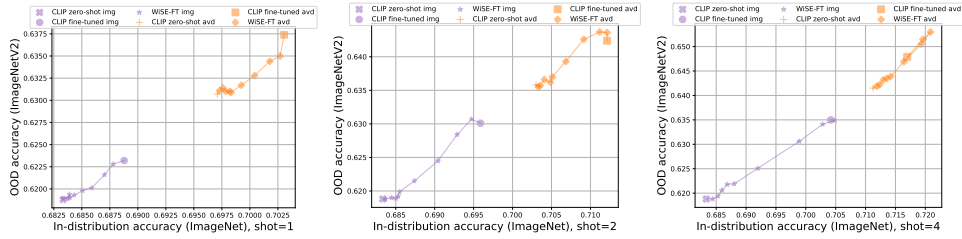

Figure 12: ID-OOD curves of WISE-FT vs WISE-SLR on IN-V2.  $k = 1, 2, 4$ .

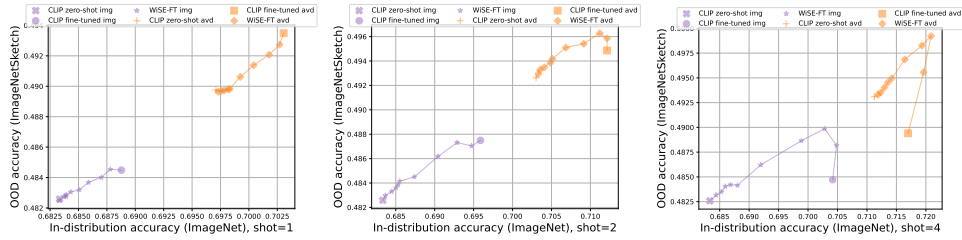

Figure 13: ID-OOD curves of WISE-FT vs WISE-SLR on IN-Sketch.  $k = 1, 2, 4$ .

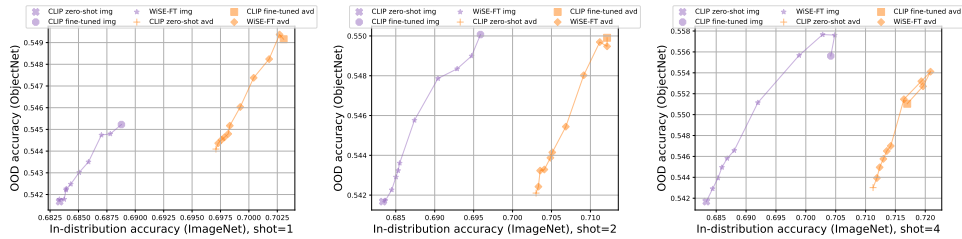

Figure 14: ID-OOD curves of WISE-FT vs WISE-SLR on ObjectNet.  $k = 1, 2, 4$ .



| Classes   | Features                                                                                                                                 |
|-----------|------------------------------------------------------------------------------------------------------------------------------------------|
| airplanes | airplanes which has anticollision lights<br>a photo of airplanes<br>airplanes which has overhead storage bins                            |
| cars      | cars which has body kit<br>cars which has bumpers<br>cars which has wheel arch trim                                                      |
| birds     | birds which has leg color<br>birds which has flight silhouette<br>birds which has eye color                                              |
| cats      | cats which has pink tongue<br>cats which has pink nose<br>cats which has slit pupils                                                     |
| deer      | deer which has large facial glands<br>deer which has long, tufted hair on the neck and shoulders<br>deer which has short, curved antlers |
| dogs      | dogs which has silky fur<br>dogs which has pattern<br>dogs which has floppy ears                                                         |
| frogs     | frogs which has large, bulging eyes<br>frogs which has ridged or wartylooking skin<br>frogs which has a fold of skin along the back      |
| horses    | horses which has hooves<br>horses which has temperament<br>horses which has intelligence                                                 |
| ships     | ships which has lifeboats<br>ships which has bridge<br>ships which has bow                                                               |
| trucks    | trucks which has trailersway control<br>trucks which has grille<br>trucks which has lift kits                                            |

Table 5: Features selected when trained with  $\ell_1$  norm on CIFAR-10. The selected important features for each class are intuitive. Notice that the feature selection method does not restrict the candidates to be that particular class’s descriptors.

**Choosing  $\gamma$  and LLM prompting** We consider another prompt “Give me 100 useful visual features for distinguishing  $\{ \}$  in a photo”, and use it with frequency penalty (FP) 0 in ①, FP 0.1 in ②. ③ uses the GPT3 prompts in the main text with 0 FP. Unless otherwise specified, other experiments use  $\gamma = \frac{1}{M_c+1}$  and FP 0.1, and the GPT prompts in the main text. We find that the GPT3 prompt itself does not matter as much as FP – it is more important to generate a more diverse set of VD. Note in the main text we set  $\gamma = 5$ , this is because on ImageNet it is hard to guarantee the same  $M_c$  across classes (due to an excess number of classes), hence we use a large  $\gamma$  to enforce ZS-AVD relies mostly on the strong class prompts. In this ablation study, we enforce GPT to give 100 VDs per class so we can simply average over them.

| Shots    |         | $k = 1$ |       | $k = 2$ |       | $k = 4$ |       | $k = 8$ |       | $k = 16$ |       | $k = 32$ |       |
|----------|---------|---------|-------|---------|-------|---------|-------|---------|-------|----------|-------|----------|-------|
| $\alpha$ | Methods | LP      | AVD   | LP      | AVD   | LP      | AVD   | LP      | AVD   | LP       | AVD   | LP       | AVD   |
|          | 0.0000  |         | 68.78 | 69.53   | 68.78 | 69.53   | 68.78 | 69.53   | 68.78 | 69.53    | 68.78 | 69.53    | 68.78 |
| 0.0001   |         | 68.79   | 69.54 | 68.83   | 69.54 | 68.85   | 69.54 | 68.87   | 69.55 | 68.92    | 69.55 | 68.94    | 69.55 |
| 0.0002   |         | 68.81   | 69.54 | 68.88   | 69.55 | 68.91   | 69.55 | 68.93   | 69.56 | 69.02    | 69.56 | 69.07    | 69.56 |
| 0.0004   |         | 68.86   | 69.56 | 68.96   | 69.58 | 69.03   | 69.58 | 69.09   | 69.59 | 69.24    | 69.59 | 69.35    | 69.59 |
| 0.0008   |         | 68.94   | 69.59 | 69.14   | 69.63 | 69.26   | 69.64 | 69.40   | 69.64 | 69.65    | 69.66 | 69.84    | 69.68 |
| 0.0016   |         | 69.06   | 69.62 | 69.38   | 69.72 | 69.63   | 69.74 | 69.93   | 69.79 | 70.36    | 69.79 | 70.70    | 69.83 |
| 0.0032   |         | 69.22   | 69.72 | 69.73   | 69.86 | 70.17   | 69.93 | 70.73   | 70.00 | 71.40    | 70.07 | 72.01    | 70.08 |
| 0.0063   |         | 68.99   | 69.81 | 69.69   | 70.06 | 70.71   | 70.22 | 71.54   | 70.40 | 72.52    | 70.50 | 73.38    | 70.51 |
| 0.0126   |         | 67.31   | 69.83 | 68.04   | 70.33 | 70.35   | 70.75 | 71.65   | 71.09 | 73.10    | 71.25 | 74.22    | 71.27 |
| 0.0251   |         | 62.15   | 69.26 | 63.91   | 70.33 | 68.12   | 71.18 | 70.42   | 71.88 | 72.45    | 72.23 | 74.12    | 72.36 |
| 0.0501   |         | 53.51   | 66.75 | 57.69   | 69.30 | 64.35   | 71.17 | 68.18   | 72.37 | 71.10    | 73.08 | 73.30    | 73.44 |
| 0.1000   |         | 44.41   | 61.19 | 51.99   | 66.38 | 60.59   | 69.99 | 65.81   | 71.96 | 69.62    | 73.45 | 72.46    | 74.26 |
| 0.2000   |         | 37.91   | 53.68 | 47.94   | 62.06 | 57.59   | 67.75 | 64.13   | 70.95 | 68.60    | 73.09 | 71.83    | 74.34 |
| 0.3000   |         | 35.35   | 49.40 | 46.43   | 59.57 | 56.41   | 66.32 | 63.42   | 70.15 | 68.19    | 72.62 | 71.58    | 74.21 |
| 0.4000   |         | 34.05   | 46.60 | 45.63   | 57.93 | 55.83   | 65.43 | 63.06   | 69.52 | 67.99    | 72.22 | 71.44    | 74.06 |
| 0.5000   |         | 33.22   | 44.72 | 45.12   | 56.82 | 55.44   | 64.80 | 62.82   | 69.14 | 67.85    | 72.00 | 71.33    | 73.94 |
| 0.6000   |         | 32.67   | 43.44 | 44.79   | 55.98 | 55.18   | 64.30 | 62.66   | 68.89 | 67.75    | 71.81 | 71.27    | 73.85 |
| 0.7000   |         | 32.27   | 42.47 | 44.52   | 55.39 | 54.99   | 63.92 | 62.54   | 68.68 | 67.70    | 71.67 | 71.23    | 73.77 |
| 0.8000   |         | 31.96   | 41.71 | 44.31   | 54.87 | 54.85   | 63.62 | 62.45   | 68.51 | 67.62    | 71.57 | 71.20    | 73.73 |
| 0.9000   |         | 31.69   | 41.11 | 44.17   | 54.47 | 54.74   | 63.39 | 62.39   | 68.36 | 67.59    | 71.48 | 71.17    | 73.71 |
| 1.0000   |         | 31.51   | 40.56 | 44.06   | 54.16 | 54.66   | 63.19 | 62.33   | 68.23 | 67.55    | 71.40 | 71.15    | 73.67 |

Table 6: Accuracies on ImageNet with difference choices of  $\alpha$ . We compare LP vs SLR-AVD.

| Shots    |         | $k = 1$ |       | $k = 2$ |       | $k = 4$ |       | $k = 8$ |       | $k = 16$ |       | $k = 32$ |       |
|----------|---------|---------|-------|---------|-------|---------|-------|---------|-------|----------|-------|----------|-------|
| $\alpha$ | Methods | LP      | AVD   | LP      | AVD   | LP      | AVD   | LP      | AVD   | LP       | AVD   | LP       | AVD   |
|          | 0.0000  |         | 58.66 | 59.03   | 58.66 | 59.03   | 58.66 | 59.03   | 58.66 | 59.03    | 58.66 | 59.03    | 58.66 |
| 0.0001   |         | 58.67   | 59.03 | 58.68   | 59.03 | 58.69   | 59.04 | 58.70   | 59.04 | 58.70    | 59.04 | 58.71    | 59.04 |
| 0.0002   |         | 58.68   | 59.02 | 58.68   | 59.04 | 58.70   | 59.04 | 58.71   | 59.04 | 58.70    | 59.04 | 58.73    | 59.04 |
| 0.0004   |         | 58.69   | 59.03 | 58.70   | 59.04 | 58.71   | 59.04 | 58.73   | 59.03 | 58.75    | 59.05 | 58.81    | 59.05 |
| 0.0008   |         | 58.70   | 59.03 | 58.75   | 59.06 | 58.81   | 59.06 | 58.84   | 59.06 | 58.88    | 59.06 | 58.99    | 59.06 |
| 0.0016   |         | 58.72   | 59.06 | 58.81   | 59.08 | 58.90   | 59.09 | 59.03   | 59.11 | 59.07    | 59.08 | 59.23    | 59.11 |
| 0.0032   |         | 58.69   | 59.07 | 58.77   | 59.13 | 58.97   | 59.18 | 59.15   | 59.19 | 59.20    | 59.16 | 59.47    | 59.21 |
| 0.0063   |         | 58.30   | 59.10 | 58.27   | 59.14 | 58.79   | 59.23 | 58.89   | 59.31 | 58.98    | 59.28 | 59.40    | 59.37 |
| 0.0126   |         | 56.77   | 58.90 | 56.41   | 59.16 | 57.40   | 59.30 | 57.56   | 59.45 | 57.79    | 59.49 | 58.34    | 59.59 |
| 0.0251   |         | 52.55   | 58.09 | 51.93   | 58.70 | 54.30   | 59.14 | 54.81   | 59.38 | 55.47    | 59.55 | 56.28    | 59.78 |
| 0.0501   |         | 45.05   | 55.46 | 45.65   | 57.11 | 49.68   | 58.20 | 51.10   | 58.73 | 52.54    | 59.13 | 53.86    | 59.76 |
| 0.1000   |         | 36.63   | 50.25 | 39.71   | 53.88 | 45.30   | 56.12 | 47.77   | 57.21 | 50.03    | 58.05 | 51.87    | 59.25 |
| 0.2000   |         | 30.30   | 43.39 | 35.56   | 49.45 | 42.08   | 53.33 | 45.47   | 55.21 | 48.38    | 56.46 | 50.61    | 58.29 |
| 0.3000   |         | 27.83   | 39.70 | 33.94   | 47.00 | 40.79   | 51.76 | 44.55   | 54.02 | 47.73    | 55.60 | 50.12    | 57.70 |
| 0.4000   |         | 26.59   | 37.37 | 33.09   | 45.44 | 40.10   | 50.76 | 44.09   | 53.25 | 47.39    | 55.02 | 49.88    | 57.31 |
| 0.5000   |         | 25.82   | 35.84 | 32.57   | 44.43 | 39.67   | 50.12 | 43.79   | 52.74 | 47.18    | 54.63 | 49.71    | 57.04 |
| 0.6000   |         | 25.28   | 34.73 | 32.22   | 43.70 | 39.40   | 49.63 | 43.59   | 52.36 | 47.03    | 54.37 | 49.62    | 56.82 |
| 0.7000   |         | 24.87   | 33.94 | 31.99   | 43.16 | 39.18   | 49.25 | 43.45   | 52.07 | 46.92    | 54.16 | 49.55    | 56.67 |
| 0.8000   |         | 24.59   | 33.33 | 31.80   | 42.72 | 39.03   | 48.95 | 43.34   | 51.86 | 46.83    | 54.02 | 49.49    | 56.54 |
| 0.9000   |         | 24.36   | 32.85 | 31.65   | 42.38 | 38.91   | 48.71 | 43.26   | 51.67 | 46.77    | 53.88 | 49.44    | 56.45 |
| 1.0000   |         | 24.17   | 32.42 | 31.53   | 42.08 | 38.80   | 48.51 | 43.19   | 51.54 | 46.72    | 53.79 | 49.41    | 56.35 |

Table 7: Accuracies on ImageNet variations with difference choices of  $\alpha$ . We compare LP vs SLR-AVD. The results are averaged over all 5 ImageNet variations.

| Shot     |        | $k = 1$ |          | $k = 2$ |          | $k = 4$ |          |
|----------|--------|---------|----------|---------|----------|---------|----------|
| $\alpha$ | Method | WISE-FT | WISE-SLR | WISE-FT | WISE-SLR | WISE-FT | WISE-SLR |
| 0.00     |        | 58.39   | 59.07    | 58.39   | 59.21    | 58.39   | 59.33    |
| 0.02     |        | 58.40   | 59.09    | 58.40   | 59.22    | 58.45   | 59.39    |
| 0.04     |        | 58.40   | 59.11    | 58.44   | 59.27    | 58.53   | 59.45    |
| 0.06     |        | 58.42   | 59.11    | 58.46   | 59.31    | 58.62   | 59.49    |
| 0.08     |        | 58.42   | 59.12    | 58.48   | 59.33    | 58.69   | 59.58    |
| 0.10     |        | 58.44   | 59.14    | 58.51   | 59.38    | 58.73   | 59.63    |
| 0.20     |        | 58.46   | 59.20    | 58.65   | 59.48    | 59.07   | 59.97    |
| 0.40     |        | 58.50   | 59.29    | 58.82   | 59.68    | 59.40   | 60.24    |
| 0.60     |        | 58.55   | 59.38    | 58.97   | 59.80    | 59.60   | 60.37    |
| 0.80     |        | 58.56   | 59.44    | 58.98   | 59.75    | 59.68   | 60.19    |
| 1.00     |        | 58.58   | 59.49    | 58.98   | 59.74    | 59.50   | 59.88    |

Table 8: Accuracies on ImageNet variations with difference choice of  $\alpha$ . We compare WISE-FT to WISE-SLR. The results are averaged over 5 ImageNet variations.

| Shot     |        | $k = 1$ |          | $k = 2$ |          | $k = 4$ |          |
|----------|--------|---------|----------|---------|----------|---------|----------|
| $\alpha$ | Method | WISE-FT | WISE-SLR | WISE-FT | WISE-SLR | WISE-FT | WISE-SLR |
| 0.00     |        | 68.33   | 69.71    | 68.33   | 70.30    | 68.33   | 71.13    |
| 0.02     |        | 68.33   | 69.73    | 68.37   | 70.33    | 68.44   | 71.19    |
| 0.04     |        | 68.37   | 69.76    | 68.45   | 70.35    | 68.53   | 71.24    |
| 0.06     |        | 68.39   | 69.78    | 68.50   | 70.41    | 68.60   | 71.30    |
| 0.08     |        | 68.39   | 69.82    | 68.53   | 70.49    | 68.68   | 71.36    |
| 0.10     |        | 68.43   | 69.83    | 68.55   | 70.51    | 68.80   | 71.42    |
| 0.20     |        | 68.51   | 69.92    | 68.74   | 70.68    | 69.20   | 71.64    |
| 0.40     |        | 68.59   | 70.04    | 69.04   | 70.91    | 69.89   | 71.93    |
| 0.60     |        | 68.70   | 70.18    | 69.29   | 71.12    | 70.28   | 72.09    |
| 0.80     |        | 68.78   | 70.27    | 69.47   | 71.21    | 70.48   | 71.96    |
| 1.00     |        | 68.88   | 70.31    | 69.59   | 71.21    | 70.42   | 71.70    |

Table 9: Accuracies on ImageNet with difference choice of  $\alpha$ . We compare WISE-FT to WISE-SLR.

Table 10: ZS ablation on  $\gamma$  and GPT prompts.

| $\gamma$ or prompts | $1/(M_c + 1)$ | 1     | 5     | ①     | ②     | ③     |
|---------------------|---------------|-------|-------|-------|-------|-------|
| CIFAR10             | 91.51         | 91.19 | 91.16 | 91.25 | 91.42 | 90.44 |
| CIFAR10.1           | 86.35         | 85.90 | 85.90 | 85.90 | 85.60 | 85.40 |
| CIFAR10.2           | 83.80         | 83.10 | 83.10 | 83.20 | 84.20 | 82.50 |
